# Supplementary material for: Boosting the thermoelectric performance of Yb-filled skutterudites through the incorporation of YSb nanoprecipitates
Source: Royal Society of Chemistry journal article supplement (doi:10.1039/d3qi02439c), 2024-01-01
Supplement: d3qi02439c1.pdf [file d3qi02439c1.pdf]

# Boosting thermoelectric performance of Yb filled skutterudites through incorporation of YSb nanoprecipitates

Dandan Qin <sup>1,\*</sup>, Wenjing Shi <sup>2</sup>, Xin Wang <sup>1</sup>, Cunlei Zou <sup>1</sup>, Chun Shang <sup>1</sup>, Xiangcheng Cui <sup>1</sup>, Huijun Kang <sup>3</sup>, Yunzhuo Lu <sup>1,\*</sup>, Jiehe Sui <sup>2,\*</sup>

<sup>1</sup> School of Materials Science and Engineering, Dalian Jiaotong University, Dalian 116028, China

<sup>2</sup> State Key Laboratory of Advanced Welding and Joining, Harbin Institute of Technology, Harbin 150001, China

<sup>3</sup> Key Laboratory of Solidification Control and Digital Preparation Technology (Liaoning Province), School of Materials Science and Engineering, Dalian University of Technology, Dalian 116024, China

\* To whom correspondence should be addressed. E-mail: [qindandan@djtu.edu.cn](mailto:qindandan@djtu.edu.cn) (Dandan Qin), [luyz@djtu.edu.cn](mailto:luyz@djtu.edu.cn) (Yunzhuo Lu), [suijiehe@hit.edu.cn](mailto:suijiehe@hit.edu.cn) (Jiehe Sui)

## S-I: Materials and Methods

Sample synthesis: Starting materials including Y piece (99.9%, Alfa Aesar), Ce ingot (99.8%, Alfa Aesar), Co piece (99.95%, Alfa Aesar), Sb ball (99.999%, Alfa Aesar) were firstly weighted according to stoichiometric  $\text{Y}_{0.05}\text{Yb}_x\text{Co}_4\text{Sb}_{12}$  ( $x = 0.15, 0.2, 0.25, 0.3$ ) and  $\text{Yb}_{0.2}\text{Co}_4\text{Sb}_{12}$ , then sealed in the silica tubes under vacuum. All the procedure mentioned above were carried out in a glove box with Ar atmosphere. The sealed tubes were then transmitted to a box furnace and slowly heated to 1423 K in 20 h, soaked at the fixed temperature for 3 h, and then furnace cooled to the room temperature. The reacted ingots were put in the cleaned quartz tubes with a fine nozzle, which were induction-molten and then injected on the cool copper wheel with a rotating speed of  $50 \text{ m s}^{-1}$  under the high-purity Ar atmosphere. The obtained ribbons were ground into fine powders and then were densified by the hot-press method at 1023 K for 1 h with an axial pressure of 90 MPa under vacuum of  $5 \times 10^{-3} \text{ Pa}$ .

Microstructure characterization: The phase structures are determined using a

PANalyticalX'Pert Pro X-ray diffractometer with Cu  $K\alpha$  radiation ( $\lambda=1.5418$  Å). The morphology and actual composition are analyzed by a HELIOS Nanolab 600i scanning electronic microscope (SEM) with the energy-dispersive X-ray spectroscopy (EDS).

Properties characterization: The sintered bulk pellet is cut into bar with dimension of  $2 \times 2 \times 12$  mm<sup>3</sup> for the electrical resistivity and Seebeck coefficient measurement on a system (CTA) under low-pressure helium atmosphere from 300 K to 873 K. The thermal conductivity  $\kappa$  can be calculated according to the relationship  $\kappa=D\rho C_p$ , where  $D$  is thermal diffusivity coefficient,  $\rho$  is the density, and  $C_p$  is specific capacity. Disk with diameter of 12.7 mm and thickness of 1.5 mm is prepared to measure the thermal diffusivity coefficient  $D$  using laser flash analysis method (Netzsch LFA 427) under a continuous nitrogen flow from 300 K to 873 K. The density is determined by Archimedes method, and relative densities of all samples are higher than 96%. The  $C_p$  is calculated using Dulong-Petit relationship. The Hall coefficient ( $R_H$ ) is obtained using the van der Pauw technique with a reversible magnetic field of 1.5 T. The carrier concentration ( $n_H$ ) and the carrier mobility ( $\mu_H$ ) are calculated by  $n_H=1/eR_H$  and  $\mu_H=\sigma R_H$ , respectively.

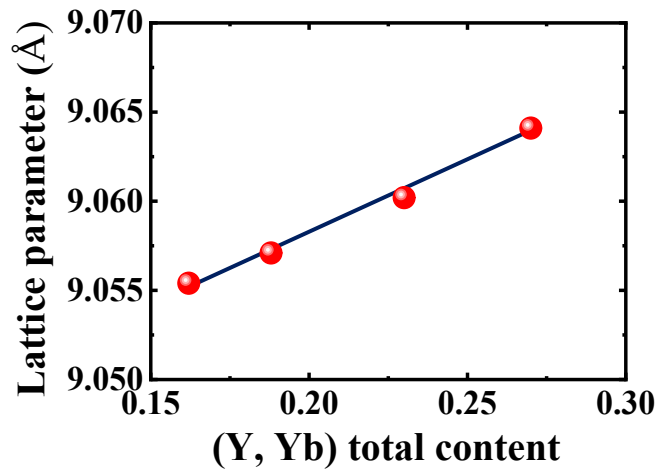

**Figure S1.** The (Y, Yb) total content dependent lattice parameter.

**Table S1.** The actual filling fraction for Y and Yb elements, and lattice parameter for  $Y_{0.05}Yb_xCo_4Sb_{12}$  and  $Yb_{0.2}Co_4Sb_{12}$  alloys.

| Nominal composition            | Actual Y content | Actual Yb content | Lattice parameter (Å) | Density (g cm <sup>-3</sup> ) |
|--------------------------------|------------------|-------------------|-----------------------|-------------------------------|
| $Y_{0.05}Yb_{0.15}Co_4Sb_{12}$ | 0.032            | 0.13              | 9.0554                | 7.56                          |

|                                                            |       |       |        |      |
|------------------------------------------------------------|-------|-------|--------|------|
| $\text{Y}_{0.05}\text{Yb}_{0.2}\text{Co}_4\text{Sb}_{12}$  | 0.003 | 0.18  | 9.0571 | 7.57 |
| $\text{Y}_{0.05}\text{Yb}_{0.25}\text{Co}_4\text{Sb}_{12}$ | 0.000 | 0.23  | 9.0602 | 7.54 |
| $\text{Y}_{0.05}\text{Yb}_{0.3}\text{Co}_4\text{Sb}_{12}$  | 0.000 | 0.27  | 9.0641 | 7.56 |
| $\text{Yb}_{0.2}\text{Co}_4\text{Sb}_{12}$                 | —     | 0.175 | 9.0697 | 7.55 |

### The calculation of $\kappa_l$ with Callaway mode

Based on the Callaway mode, the  $\kappa_l$  can be expressed as <sup>[1-3]</sup>:

$$\kappa_l = \frac{k_B}{2\pi^2 v} \left( \frac{k_B T}{\hbar} \right)^3 \int_0^{\theta_D/T} \tau_c \frac{x^4 e^x}{(e^x - 1)^2} dx \quad (1)$$

where  $k_B$  is the Boltzmann constant,  $\hbar$  is the Plank's reduced constant,  $v$  is the average sound (phonon-group) velocity,  $x$  is the usual dimensionless variable  $\hbar\omega/k_B T$  and  $\tau_c$  is the combined relaxation time, and  $\theta_D$  is the Debye temperature. For skutterudites

$$\theta_D = \beta(M\delta^3)^{-1/2} \quad (2)$$

where  $\beta$  is a function of elastic constants,  $M$  the average atom weight, and  $\delta^3$  the volume.

For the present case, three phonon scattering mechanisms including boundary scattering, point-defect scattering, and phonon-phonon scattering are considered to calculate the frequency-dependent relaxation time,

$$\tau_c^{-1} = \frac{v}{l} + A\omega^4 + B\omega^2 T e^{\left(\frac{\theta_D}{3T}\right)} \quad (3)$$

where  $l$  is the average grain size, the coefficients  $A$  and  $B$  are fitting parameters. The values of relevant parameters are shown in **Table S2** and **S3**. Compared with the pristine sample, the samples with YSb nanoparticles exhibit lower  $\kappa_l$ . Therefore, it is plausible to infer that this reduction in  $\kappa_l$  can be ascribed to the phonon scattering caused by the nanoparticles. The nanoparticles' contribution to the relaxation time  $\tau_{NP}^{-1}$  is estimated using a Matthiessen-type interpolation between the scattering regimes of the long and short wavelengths <sup>[4-6]</sup>

$$\tau_{NP}^{-1} = v (\sigma_s^{-1} + \sigma_l^{-1}) V_P \quad (4)$$

$$\sigma_s = 2\pi R^2 \quad (5)$$

$$\sigma_l = \frac{4}{9} \pi R^2 \left( \frac{\Delta D}{D} \right) \left( \frac{\omega R}{v} \right)^4 \quad (6)$$

where  $V_P$  is the density of nanoparticles,  $\sigma_s$  and  $\sigma_l$  are the cross-section limits,  $R$  is the

average size of the particles,  $D$  is the corresponding mass density,  $\Delta D$  is the mass density difference between the nanoscale particle and the matrix,  $\omega$  is the phonon frequency, respectively. Therefore, the combined phonon relaxation field should be written as

$$\tau_c^{-1} = \frac{\nu}{l} + A\omega^4 + B\omega^2 Te^{\left(\frac{\theta_D}{3T}\right)} + \nu(\sigma_s^{-1} + \sigma_l^{-1})V_p \quad (7)$$

**Table S2.** Input parameters for calculation of relaxation time of phonon scattering for  $Y_{0.05}Yb_{0.2}Co_4Sb_{12}$  composites.

| $L$ ( $\mu m$ ) | $\theta_D$ (K) | $\nu$ (m/s) | $R$ (nm) | $D_n$ (gcm <sup>-3</sup> ) | $D_m$ (gcm <sup>-3</sup> ) | $\Delta D$ (gcm <sup>-3</sup> ) |
|-----------------|----------------|-------------|----------|----------------------------|----------------------------|---------------------------------|
| 0.5             | 287            | 3000        | 25       | 5.97                       | 7.6                        | 1.77                            |

**Table S3.** Values of lattice thermal conductivity fit parameters for  $Y_{0.05}Yb_{0.2}Co_4Sb_{12}$  and  $Yb_{0.2}Co_4Sb_{12}$  alloys.

| Composition                   | $A$ (10 <sup>-43</sup> s <sup>3</sup> ) | $B$ (10 <sup>-17</sup> s/K) | $V_p$ (10 <sup>21</sup> m <sup>-3</sup> ) |
|-------------------------------|-----------------------------------------|-----------------------------|-------------------------------------------|
| $Yb_{0.2}Co_4Sb_{12}$         | 26.67                                   | 0.98                        | 0                                         |
| $Y_{0.05}Yb_{0.2}Co_4Sb_{12}$ | 26.15                                   | 1.08                        | 6.12                                      |

## Reference:

- [1] G. S. Yang, R. M. Niu, L. N. Sang, X. Z. Liao, D. R. G. Mitchell, N. Ye, J. Pei, J. F. Li, X. L. Wang. *Advanced Energy Materials* 2020, 10.
- [2] H. L. Zhuang, H. H. Hu, J. Pei, B. Su, J. W. Li, Y. L. Jiang, Z. R. Han, J. F. Li. *Energy & Environmental Science* 2022, 15, 2039-2048.
- [3] J. Callaway, H. C. Von Baeyer. *Physical Review* 1960, 120, 1149-1154.
- [4] H. Jiaqing, S. N. Girard, Z. Jin-Cheng, Z. Lidong, M. G. Kanatzidis, V. P. Dravid. *Advanced materials* 2012, 24, 4440-4444.
- [5] H. Jiaqing, A. John, M. G. Kanatzidis, V. P. Dravid. *Nano Lett* 2012, 12, 343.
- [6] C. B. Vining. *Journal of Applied Physics* 1991, 69, 331-330.
